# Supplementary material for: Enhanced brain structure-function tethering in transmodal cortex revealed by high-frequency eigenmodes
Source: PubMed Central journal article supplement (PMC10598018; doi:10.1038/s41467-023-42053-4), 2023-10-24
Supplement: 41467_2023_42053_MOESM1_ESM.pdf [file 41467_2023_42053_MOESM1_ESM.pdf]

## 1 **Supplementary Information**

### 2 **Supplementary Note 1**

#### 3 *Analysis of individual subjects*

4 To improve the signal-to-noise ratio, we initially performed our analysis on group-average structural and  
5 functional networks. Here, we sought to understand the regional patterns of structure-function coupling  
6 estimated by low-frequency and high-frequency eigenmodes from the perspective of individual subjects.

7 For low-frequency eigenmodes, we conducted the fitting procedure for every subject, which returns a  
8 matrix of coupling  $R$  whose size is [69 subjects  $\times$  1,000 regions] (Fig. 6a). As in the previous section, we  
9 found considerable variability across regions (one-way ANOVA  $R$ ;  $F(999)=11.9$ ;  $p<10^{-15}$ ), confirming  
10 the regionally heterogeneous roles of low-frequency eigenmodes in local structure-function prediction.  
11 To visualize the spatial distribution of these results, we averaged over subjects and plotted the mean  
12 structure-function coupling  $R$  for each region (Fig. 6b). We found that the magnitude of structure-  
13 function coupling varied systematically across the cortex, with primary unimodal cortices exhibiting the  
14 higher prediction accuracies than transmodal association cortex.

15 To assess whether the contributions of low-frequency eigenmodes were concentrated within specific  
16 functional systems, we aggregated these  $R$  values by seven functional networks and compared the  
17 network-specific mean  $R$  with the null distribution generated by a spatially-constrained permutation  
18 model (spin test; 10,000 permutations). We found that the visual network had significantly higher  
19 structure-function coupling relative to the null distribution while ventral attention, frontoparietal, and  
20 default mode networks exhibited lower  $R$  values than the level expected by chance (FDR corrected  
21  $P<10^{-4}$ ; Fig. 6c). Considering the inter-individual heterogeneity, we also provided the distributions of  
22 network-specific mean  $R$  over all subjects (Fig. S2a). Aggregating across subjects, we found that  
23 structure and function were gradually decoupled from the visual network ( $R=0.33\pm 0.07$ ) to the  
24 frontoparietal ( $R=0.24\pm 0.05$ ) and default mode networks ( $R=0.25\pm 0.05$ ). We further repeated the  
25 analysis of network-specific effects at a single subject level and calculated for each functional network  
26 the fraction of subjects for whom the network-specific mean  $R$  was statistically significantly different  
27 from the null distribution generated by spatial permutation (FDR corrected  $P<10^{-4}$ ). As expected, we  
28 found that the visual network in 93% of subjects exhibited statistically significantly higher  $R$  values  
29 compared to the null distribution while the frontoparietal network in 43% of subjects and the default  
30 mode network in 71% of subjects exhibited statistically significantly lower  $R$  values than expected by  
31 chance.

32 We then correlated the regional coupling  $R$  with the unimodal-transmodal functional gradient for every  
33 subject, comparing the empirical correlation coefficient against those obtained using a spatially-  
34 constrained permutation model (1,000 permutations) and against those generated by randomly rewiring  
35 network edges with degree sequence preserved (1,000 permutations). Fig. S3 shows the spatial  
36 distributions of regional coupling  $R$  (panel a) for three individual subjects, as well as scatter plots  
37 showing the correlation between the functional gradient and coupling  $R$  (panel b) and the two null  
38 distributions for this correlation (panel c and d). In general, we found that the correlation between the  
39 regional  $R$  and functional gradient was overall negative although these correlation coefficients were  
40 considerably variable across subjects (Pearson  $\rho=-0.297\pm 0.168$ ; Fig. S2b), implying that structure and

41 function are gradually divergent along the unimodal-transmodal hierarchy. Using the above two kinds of  
42 subject-specific null models, we found that this anticorrelation was statistically significant in 88% of  
43 subjects relative to the first null distribution and in 71% of subjects relative to the second null  
44 distribution ( $P<0.05$ ).

45 For high-frequency eigenmodes, the structure-function coupling estimated at the individual level yielded  
46 a matrix containing  $R$  of every region and subject, which was reported in Fig. 6d. Consistent with the  
47 previous section, we observed regionally heterogeneous contributions of high-frequency eigenmodes to  
48 structure-function prediction (one-way ANOVA  $R$ ;  $F(999)=15.7$ ;  $P<10^{-15}$ ). Averaging regional  $R$  across  
49 subjects, we observed relatively weak structure-function coupling in unimodal primary and particularly  
50 in visual regions, and relatively strong coupling in transmodal association regions (Fig. 6d).

51 To examine whether the contributions of high-frequency eigenmodes are system-specific, we aggregated  
52 these  $R$  values by seven functional networks, comparing the network-specific mean  $R$  with those  
53 obtained by the spatially-constrained permutation model (spin test; 10,000 permutations). We found that  
54 regions with lower  $R$  values were prominent in the visual and dorsal attention networks whereas regions  
55 with higher  $R$  values were affiliated with the limbic, frontoparietal, and default mode networks (FDR  
56 corrected  $P<10^{-4}$ ; Fig. 6f). We also took into account inter-individual heterogeneity and plotted the  
57 distribution of network-specific mean  $R$  over all subjects (Fig. S2c). In general, the strength of structure-  
58 function coupling increased from the visual network ( $R=0.58\pm 0.03$ ) to the default mode networks  
59 ( $R=0.62\pm 0.02$ ). Compared to the null distributions generated using the spatially-constrained permutation  
60 model (spin test; 10,000 permutations), we found that 84% of subjects exhibited statistically  
61 significantly lower  $R$  values in the visual network (FDR corrected  $P<10^{-4}$ ). In contrast, the default mode  
62 network in 41% of subjects, the frontoparietal network in 23% of subjects, and the limbic network in  
63 32% of subjects displayed statistically significantly higher  $R$  values than expected by chance (FDR  
64 corrected  $P<10^{-4}$ ). These results demonstrate that the magnitude of coupling  $R$  estimated by high-  
65 frequency eigenmodes was circumscribed by functional systems, with visual cortices showing relatively  
66 lower structure-function coupling than association cortices.

67 Furthermore, we estimated the correlation between the regional structure-function coupling  $R$  and the  
68 unimodal-transmodal functional gradient for every subject. The examples of individuals' spatial  
69 distributions of  $R$  were provided in Fig. S4 (panel a), with their corresponding correlations to the  
70 macroscale functional gradient illustrated in Fig. S4 (panel b). In general, we found that the regional  $R$   
71 and functional gradient were overall positively correlated across subjects (Pearson  $\rho=0.254\pm 0.157$ ; Fig.  
72 S2d), implying that local structure-function relationships estimated by high-frequency eigenmodes are  
73 increasingly convergent along the unimodal-transmodal hierarchy. For every subject, we also compared  
74 the empirical correlation coefficient against those generated by two kinds of null models (Fig. S4, panel  
75 c and d). In the first one, we performed spatial permutation with spatial autocorrelation preserved (spin  
76 test; 1,000 permutations); in the second one, we rewired structural connections but preserved the original  
77 degree sequence (1,000 permutations). We found that 87% of subjects exhibited statistically  
78 significantly higher correlation coefficients than the first null distribution and that 65% of subjects than  
79 the second null distribution ( $P<0.05$ ).

80 Finally, we estimated the standard deviation of coupling  $R$  estimated by low-frequency and high-  
81 frequency eigenmodes for every region across all subjects. Interestingly, we found that regions with  
82 great inter-individual variations were overall concentrated in the visual and somatosensory cortex

83 whereas structure-function coupling in prefrontal, lateral temporal, and inferior parietal cortex was  
84 relatively consistent across subjects (Fig. S5a and c). Note that, for low-frequency eigenmodes, this  
85 spatial pattern is very similar to the spatial distribution of regional coupling  $R$  (Pearson  $\rho=0.79$ ), and  
86 when transforming the standard deviation to the coefficient of variation, this trend did not persist  
87 (Pearson  $\rho=0.05$ ;  $P=0.09$ ; Fig. S5b), suggesting that the regional heterogeneity in inter-individual  
88 variability observed in the case of low-frequency eigenmodes may be attributable to a floor effect. In  
89 contrast, for high-frequency eigenmodes, the negative association between inter-individual variation in  
90 structure-function coupling and the unimodal-transmodal functional gradient was still statistically  
91 significant (Pearson  $\rho=-0.53$ ;  $P<10^{-5}$ ; Fig. S5d).

92 Collectively, these results suggest that the contribution of low-frequency eigenmodes is not uniform  
93 across the brain but concentrated on the primary unimodal regions, resulting in structure-function  
94 decoupling along the unimodal-transmodal gradient. Conversely, high-frequency eigenmodes  
95 preferentially contributed to the interpretation of functional profiles of transmodal association regions,  
96 inducing gradually convergent structure-function relationships from unimodal to transmodal regions.  
97 Both of these results are consistent with those obtained from group-average data and motivate further  
98 investigation into regional patterns of structure-function tethering under different diffusion processes.

## 99 **Supplementary Note 2**

### 100 *Sensitivity analyses*

101 we performed several sensitivity analyses to confirm the robustness of the regional structure-function  
102 coupling results to choices of low-frequency and high-frequency thresholds, spatial resolutions, data  
103 acquisition, and network reconstruction. First, we calculated regional structure-function coupling using  
104 low-frequency and high-frequency eigenmodes under the choice of  $K_L$  ranging from  $K_L=10$  to  $K_L=20$   
105 and  $K_H$  ranging from  $K_H=384$  to  $K_H=484$ , respectively. We found that the regional patterns of structure-  
106 function coupling were highly robust to the choice of thresholds (the mean spatial correlation was 0.99  
107 (S.D. 0.02) for low frequencies and 0.99 (S.D. 0.00) for high frequencies; Supplementary Fig. S6). We  
108 also observed good agreement with the main regional coupling patterns when using structural and  
109 functional networks derived: (1) at another four resolutions (68, 114, 219, 448 nodes; Supplementary  
110 Fig. S7) and (2) using an independently collected dataset (HCP; Supplementary Fig. S8). We further  
111 repeated our analyses using functional networks derived from the partial correlation and found  
112 comparable results with the main text (Supplementary Fig. S9).

## 113 **Supplementary Note 3**

### 114 *Comparison of prediction models with and without high-frequency eigenmodes*

#### 115 *Null models*

116 As a control, we performed phase-randomization of empirical eigenmodes while preserving the original  
117 spatial frequency to build null benchmarks ( $10\times 100$  repetitions) [1-3]. We generated three null  
118 distributions, which corresponded to prediction models comprising phase-randomized low-frequency  
119 eigenmodes, comprising phase-randomized high-frequency eigenmodes, and comprising empirical low-  
120 frequency and phase-randomized high-frequency eigenmodes. We found that both prediction models

121 containing only low-frequency eigenmodes and containing only high-frequency eigenmodes  
122 significantly outperformed the corresponding null models ( $P < 10^{-3}$ ; Fig. S10a-c), confirming the  
123 contribution of low-frequency and high-frequency eigenmodes to structure-function prediction. We  
124 further combined empirical low-frequency eigenmodes with phase-randomized high-frequency  
125 eigenmodes and compared this null benchmark with the empirical combined model to determine  
126 whether high-frequency eigenmodes supplement information from low-frequency eigenmodes to yield  
127 improved predictions. By calculating the change in prediction accuracy ( $\Delta R$ ), we found that the null  
128 benchmark underperformed the low-high combined model, and even the baseline low-frequency model  
129 (in both cases  $P < 10^{-3}$ ; Fig. S10d). Thus, while low-frequency eigenmodes could well predict functional  
130 connectivity on their own, the introduction of noise would significantly hurt the performance of pre-  
131 existing model with good features. The small but statistically significant improvement from combining  
132 low-frequency and high-frequency eigenmodes strongly suggests this is not the case with high-  
133 frequency eigenmodes. Instead, the addition of high-frequency eigenmodes enhanced the explanation of  
134 functional interaction patterns, suggesting that high-frequency eigenmodes brought significantly more  
135 value than noise.

#### 136 *Lasso regression for all three prediction models*

137 In the main text, we performed LASSO regression only for high-frequency eigenmodes and preserved  
138 all low-frequency eigenmodes for model comparison. Here, we performed LASSO regression for low-  
139 frequency model, high-frequency model, and low-high combined model, separately. The results were  
140 illustrated in Fig. S11. We found that low-high combined outperformed low-frequency model and that  
141 the top 10% of brain regions with the highest percentage increases were mostly located in transmodal  
142 association areas.

#### 143 *Robustness to high-frequency threshold*

144 In the main text, we report results using the high-frequency threshold  $K_H=434$ . Here, we extended the  
145 choice of  $K_H$  to a wide range (from the highest 200 modes to the highest 600 modes) and repeated the  
146 main analyses of the manuscript. We found that the observed prediction improvements and preference  
147 for transmodal regions were stable across different threshold choices (Fig. S12).

148

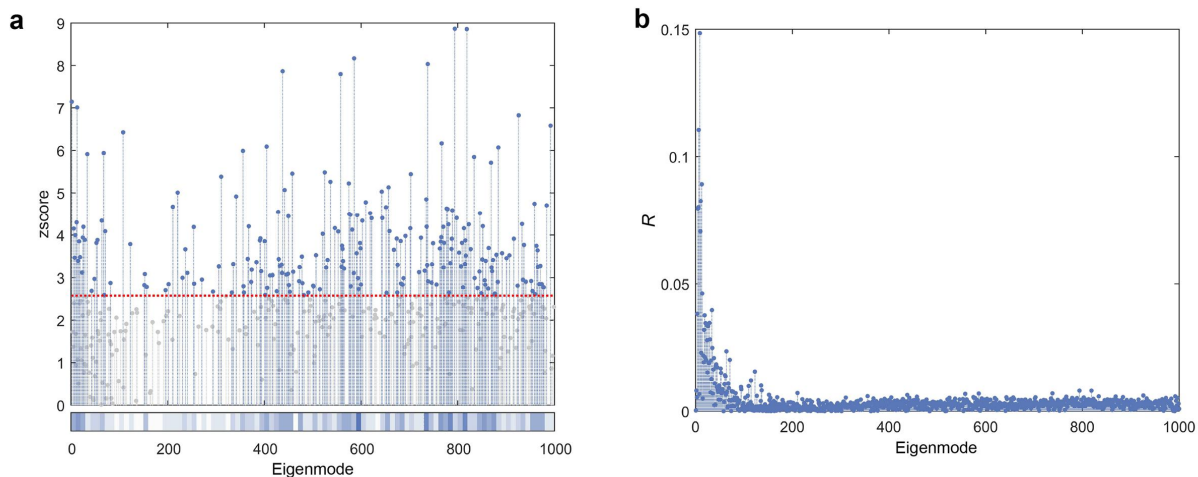

149

150

**Fig. S1.**

151

Prediction performance of single eigenmodes. (a) We applied each eigenmode to whole-brain structure-function prediction and expressed the prediction accuracy  $R$  into a z score relative to the null distribution generated by the corresponding phase-randomized eigenmodes (10,000 repetitions). Statistically significant eigenmodes were shown in color (one-sided  $P < 0.005$ ). (b) The whole-brain prediction accuracy  $R$  estimated by each individual eigenmode. Source data are provided as a Source Data file.

156

157

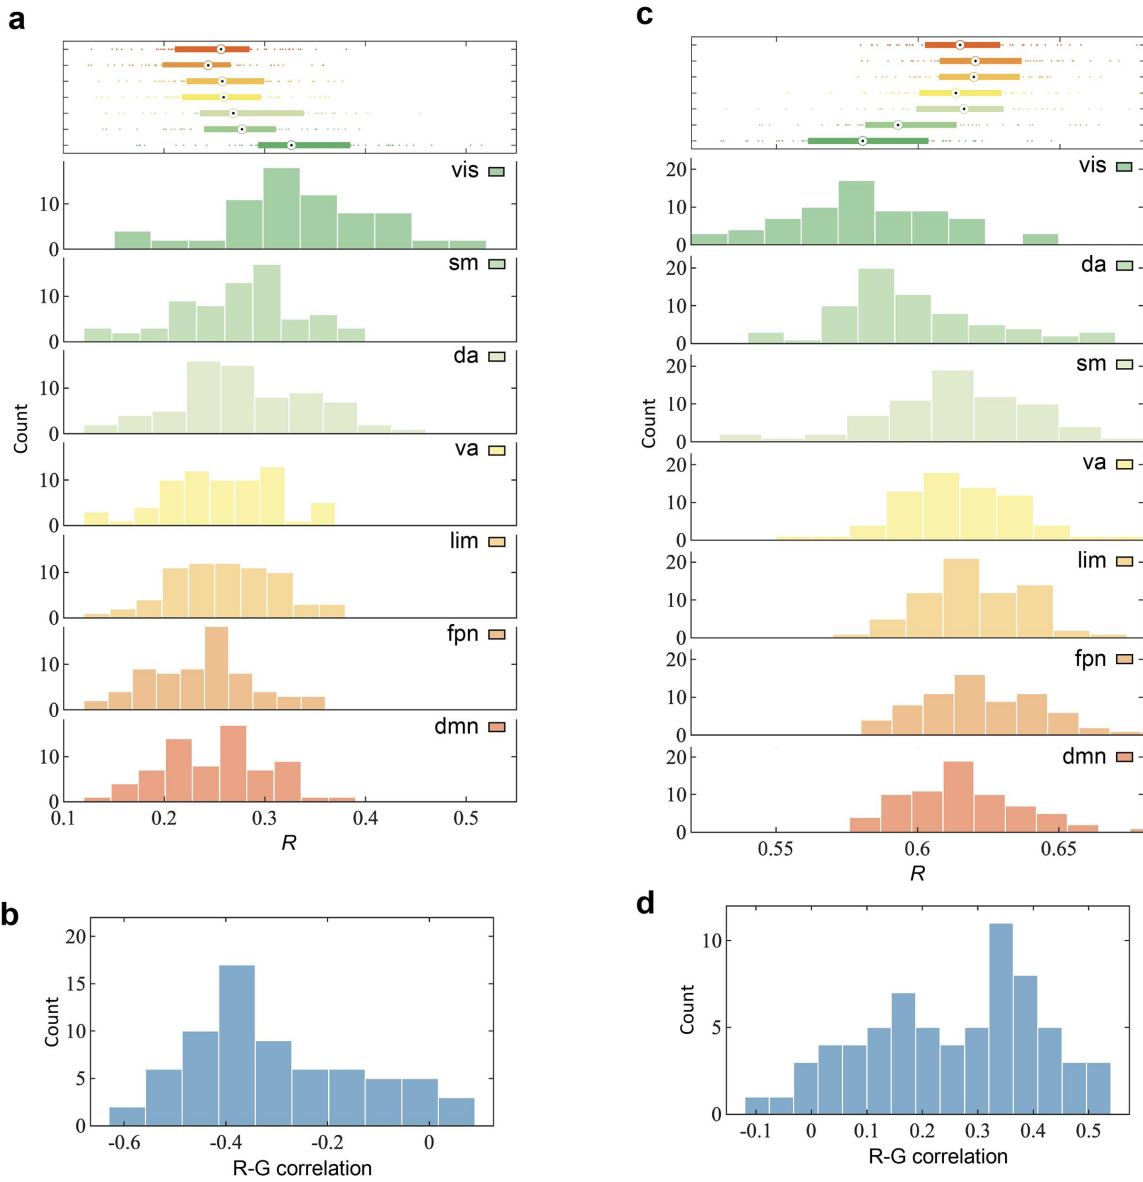

159

160

**Fig. S2.**

161

162

163

164

165

166

167

168

169

170

171

Individual structure-function coupling. **(a)** The distribution of network-specific mean  $R$  estimated by low-frequency eigenmodes over all subjects (n=69 subjects). Seven resting-state networks (RSNs): visual (vis), somatomotor (sm), dorsal attention (da), frontoparietal (fpn), ventral attention(va), limbic (lim), and default mode (dmn) networks. The boxplot shows the medians (circles), interquartile ranges (boxes), and min to max range (whiskers). **(b)** The histogram of correlation coefficients between regional coupling  $R$  estimated by low-frequency eigenmodes and functional gradient across all subjects. **(c)** The distribution of network-specific mean  $R$  estimated by high-frequency eigenmodes over all subjects (n=69 subjects). The boxplot shows the medians (circles), interquartile ranges (boxes), and min to max range (whiskers). **(d)** The histogram of correlation coefficients between regional coupling  $R$  estimated by high-frequency eigenmodes and functional gradient across all subjects. Source data are provided as a Source Data file.

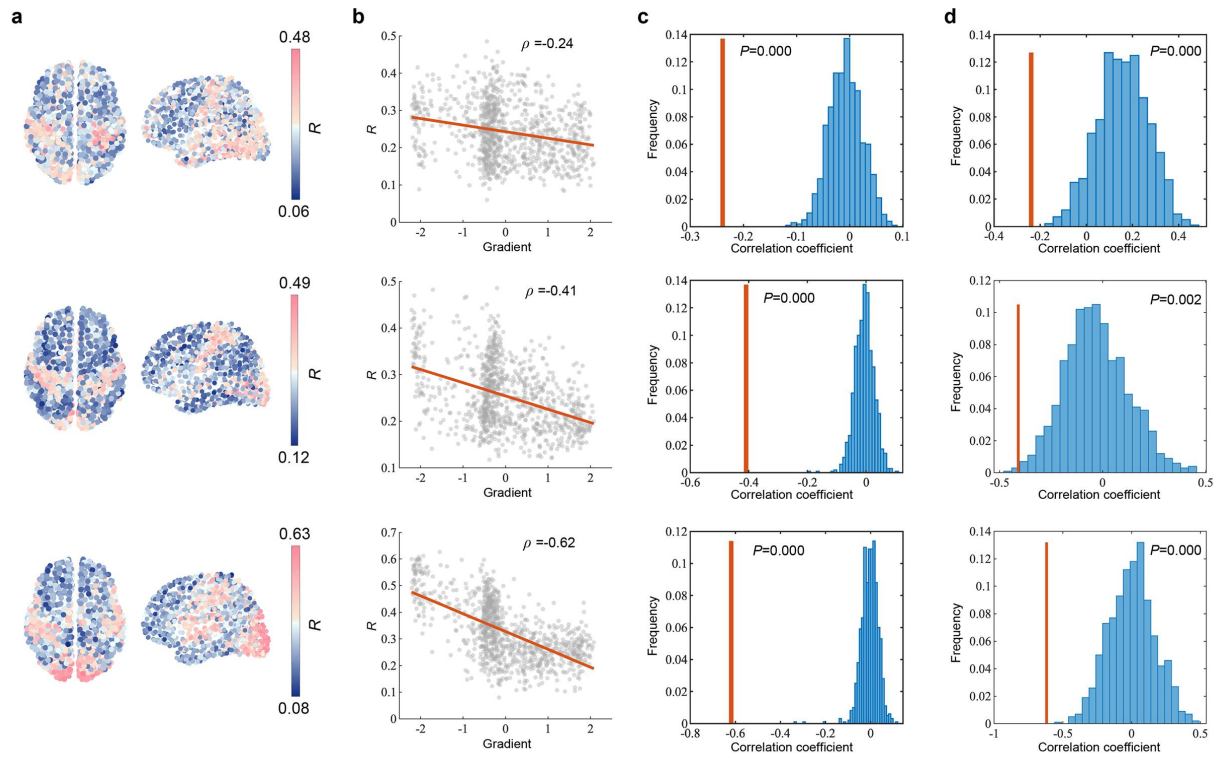

172

173

**Fig. S3.**

174

175

176

177

178

179

180

181

182

183

Regional structure-function coupling estimated by low-frequency eigenmodes for three individual subjects. **(a)** The spatial distribution. **(b)** The scatter plot showing the correlation between the functional gradient and regional coupling  $R$ . **(c)** Comparison of the empirical correlation coefficient against the null distribution generated by spatially-constrained permutation (1,000 repetitions). **(d)** Comparison of the empirical correlation coefficient against the null distribution generated by randomly rewiring network edges (1,000 repetitions). In **(c)** and **(d)**, we provided the empirical P-values (one-sided, unadjusted), calculated as the proportion of correlation coefficients generated by the null model that were more extreme than the empirical correlation coefficients. Source data are provided as a Source Data file.

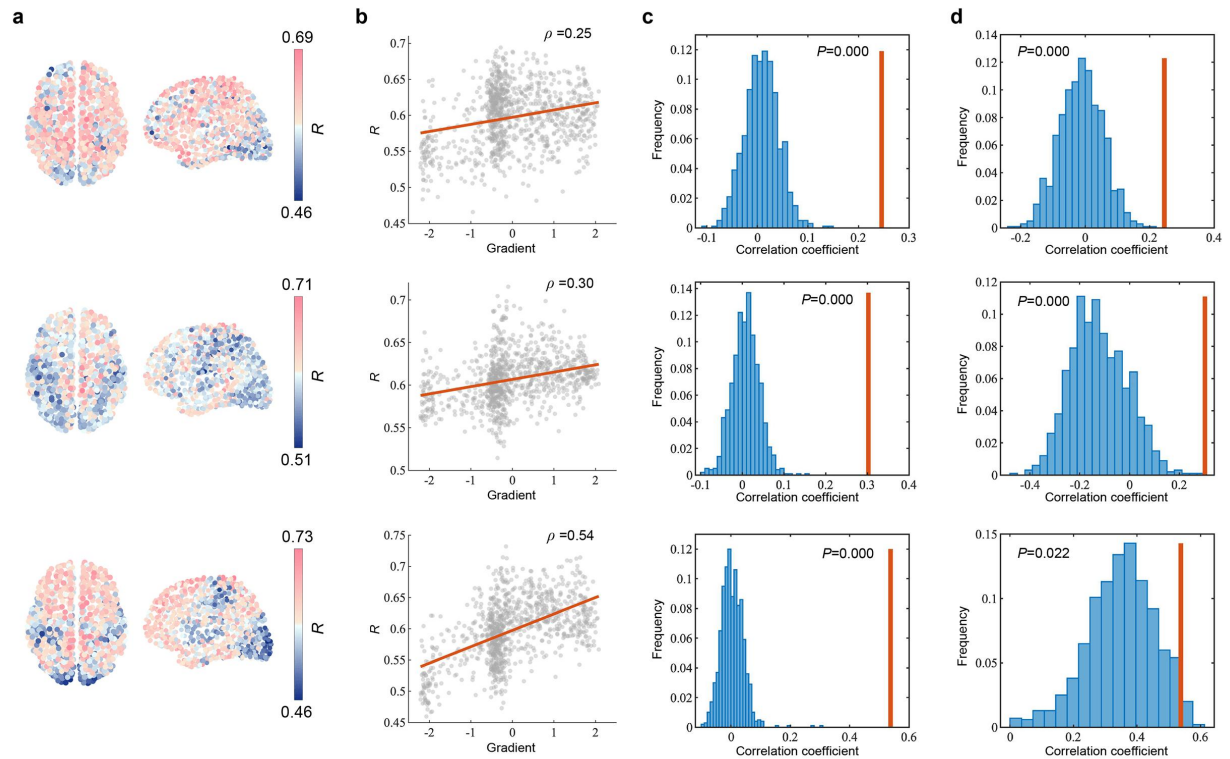

184

185

**Fig. S4.**

186

187

188

189

190

191

192

193

Regional structure-function coupling estimated by high-frequency eigenmodes for three individual subjects. (a) The spatial distribution. (b) The scatter plot showing the correlation between the functional gradient and regional coupling  $R$ . (c) Comparison of the empirical correlation coefficient against the null distribution generated by spatially-constrained permutation (1,000 repetitions). (d) Comparison of the empirical correlation coefficient against the null distribution generated by randomly rewiring network edges (1,000 repetitions). In (c) and (d), we provided the empirical P-values (one-sided, unadjusted). Source data are provided as a Source Data file.



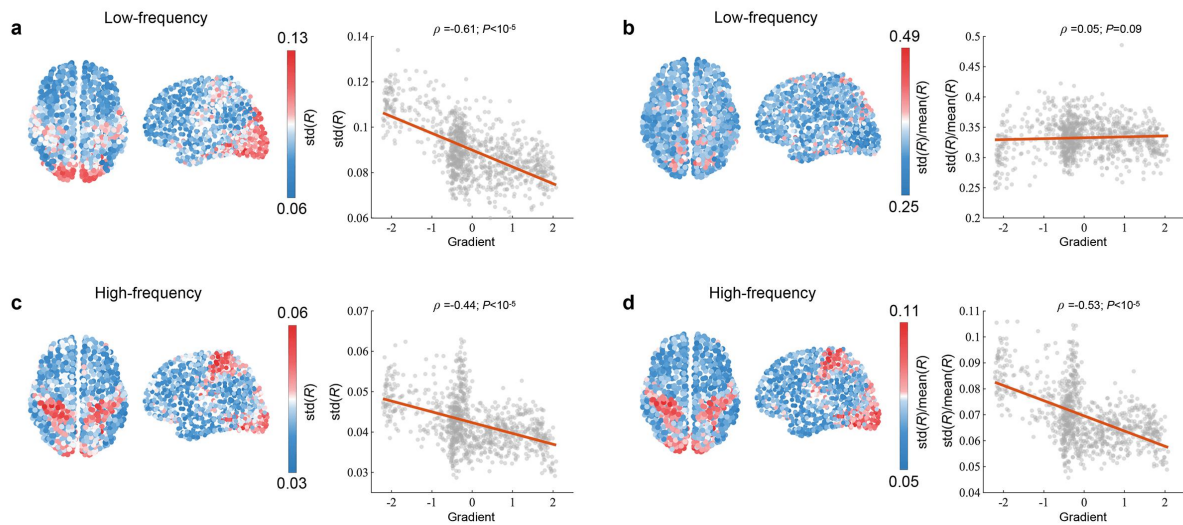

195

196

**Fig. S5.**

197

198

199

200

201

202

203

204

205

206

Inter-individual heterogeneity. **(a)** The standard deviation of regional coupling ( $n=1,000$  regions) estimated by low-frequency eigenmodes across all subjects (left), which is negatively correlated with the unimodal-transmodal gradient (right). **(b)** When transforming the standard deviation to the coefficient of variation, this negative correlation did not persist. **(c)** The standard deviation of regional coupling ( $n=1,000$  regions) estimated by high-frequency eigenmodes across all subjects (left), which is negatively correlated with the unimodal-transmodal gradient (right). **(d)** When transforming the standard deviation to the coefficient of variation, this negative correlation was still statistically significant. In **(a)-(d)**, two-sided t-test p-values were calculated. Source data are provided as a Source Data file.

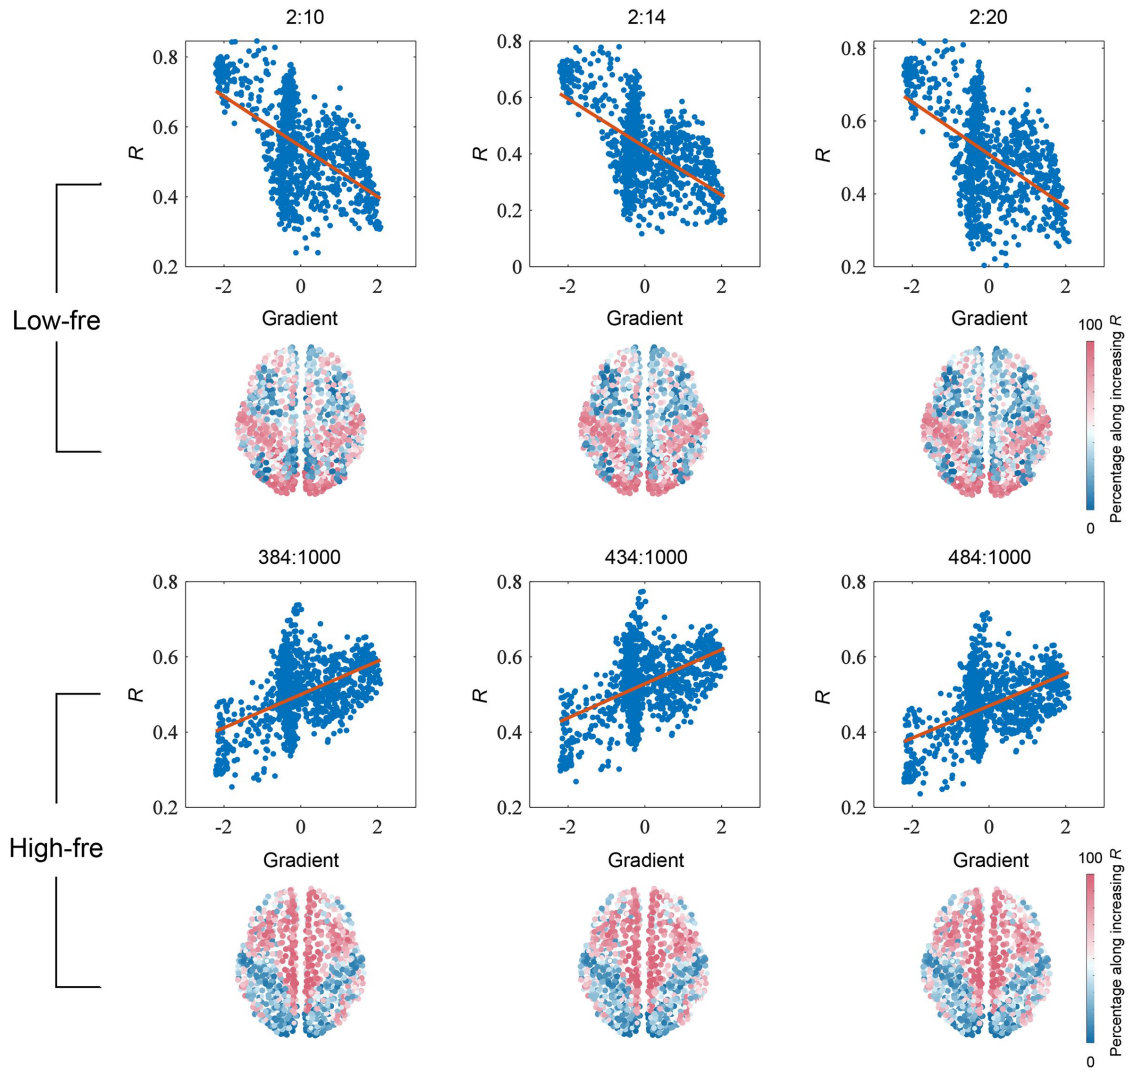

207

208

**Fig. S6.**

209

Robustness to frequency thresholds. The relationship between coupling strength  $R$  and the functional gradient is stable under different definitions of low-frequency and high-frequency eigenmodes. Source data are provided as a Source Data file.

210

211

212

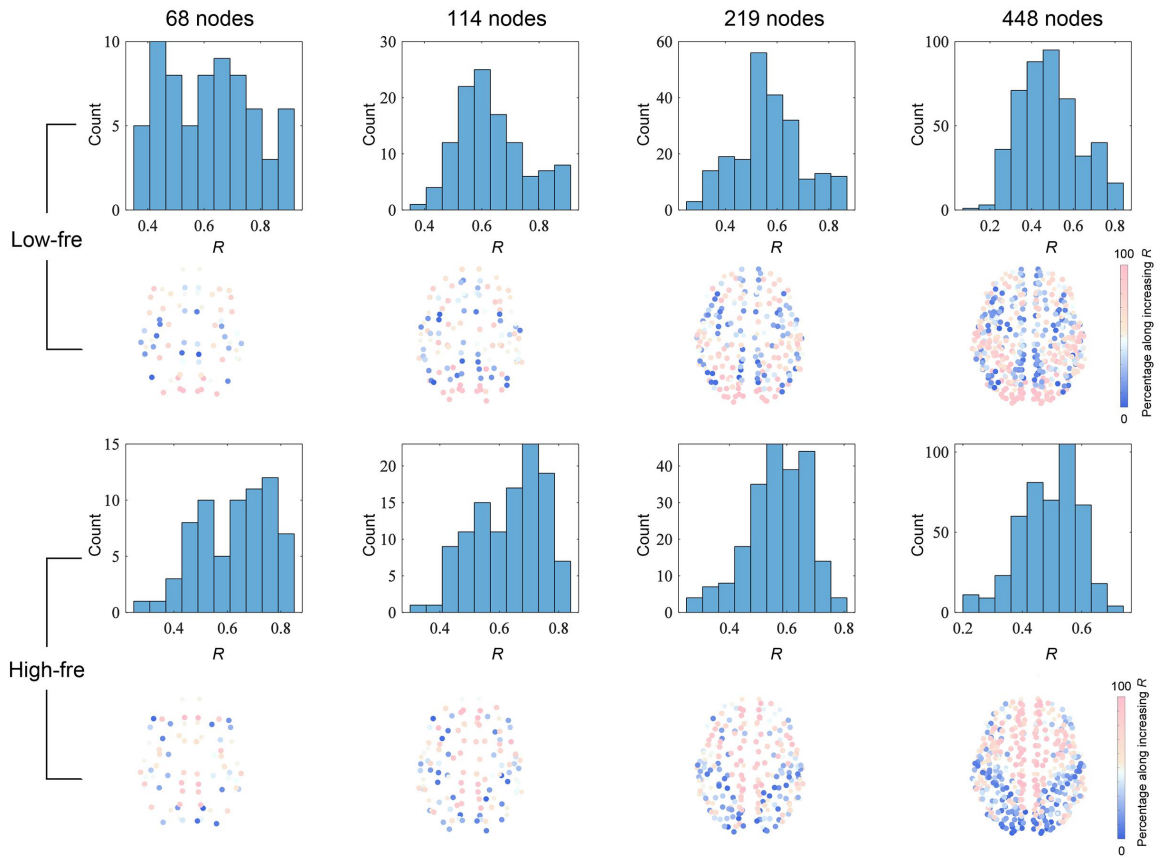

213

214

**Fig. S7.**

215

Consistency across spatial resolutions. The node-wise structure-function predictions based on low-frequency and high-frequency eigenmodes are respectively repeated in another four spatial resolutions (68, 114, 219, 448 nodes). The spatial patterns of structure-function  $R$  are visually similar. Source data are provided as a Source Data file.

216

217

218

219

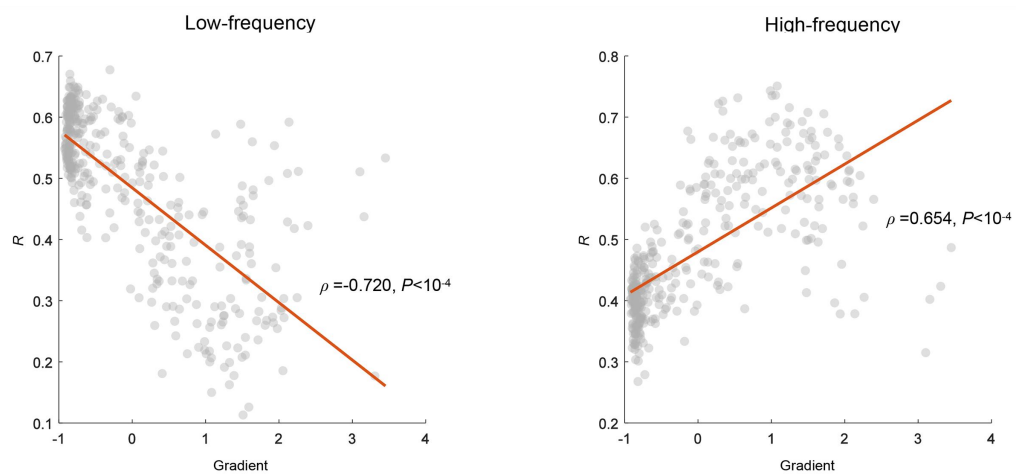

220

221

**Fig. S8.**

222

Verification on an independent dataset. The main results (structure-function divergence and convergence along the unimodal-transmodal gradient) are replicated in an independently collected dataset (Human Connectome Project HCP). Two-sided t-test p-values were calculated. Source data are provided as a Source Data file.

223

224

225

226

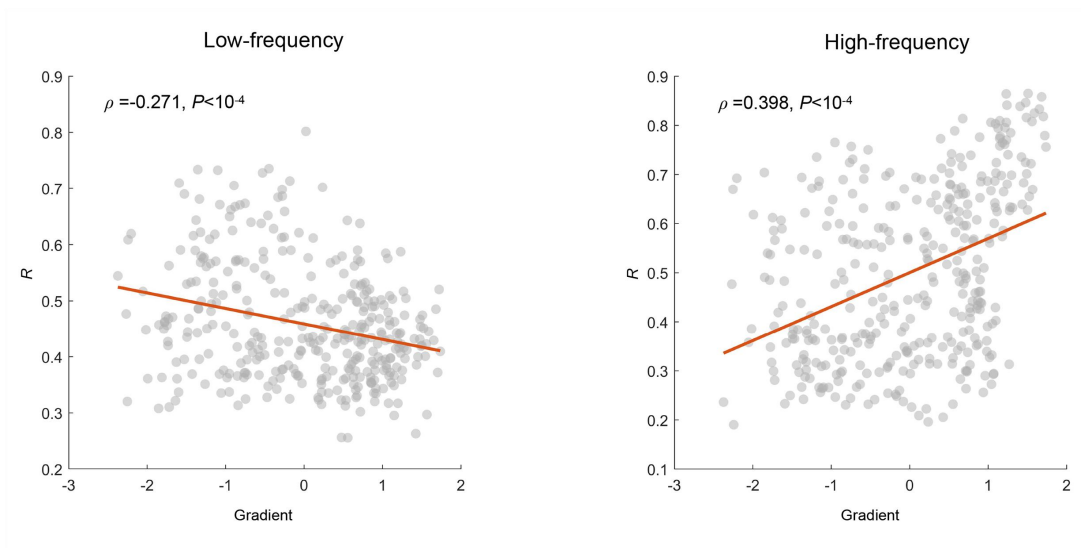

227

228

**Fig. S9.**

229

230

231

232

233

Robustness to network reconstruction. The main results (structure-function divergence and convergence along the unimodal-transmodal gradient) are preserved when using the functional connectivity matrix derived from partial correlation. Two-sided t-test p-values were calculated. Source data are provided as a Source Data file.

234

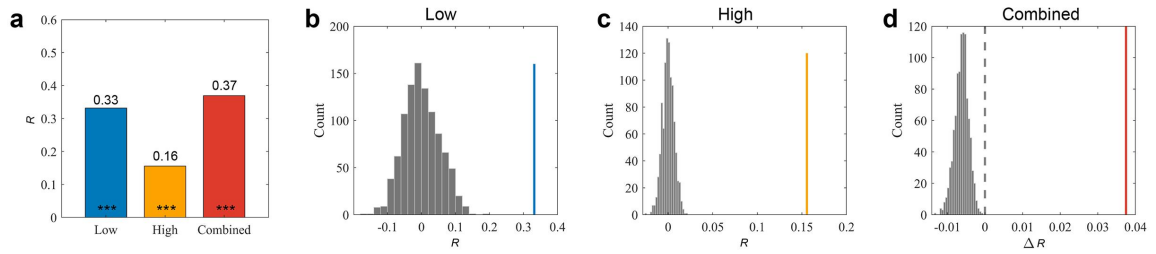

235

**Fig. S10.**

236

237 Comparison to null models. **(a)** The prediction performances of low-frequency eigenmodes (blue),  
238 high-frequency eigenmodes (orange) and low-high combined model (red) across the brain, which  
239 significantly outperform the null distributions obtained from phase-randomized low-frequency  
240 eigenmodes, phase-randomized high-frequency eigenmodes, and the model combining low and  
241 phase-randomized high eigenmodes (\*\*\*) the empirical  $P < 10^{-3}$ ). **(b)** Blue: the performance of  
242 prediction model comprising empirical low-frequency eigenmodes. Grey: the null distribution  
243 generated by prediction model comprising phase-randomized low-frequency eigenmodes. **(c)**  
244 Orange: the performance of prediction model comprising empirical high-frequency eigenmodes.  
245 Grey: the null distribution generated by prediction model comprising phase-randomized high-  
246 frequency eigenmodes. **(d)** Red: the increment in prediction accuracy ( $\Delta R$ ) with the addition of  
247 empirical high-frequency eigenmodes. Grey: the null distribution of changes in prediction  
248 accuracy generated by combining empirical low-frequency eigenmodes with phase-randomized  
249 high-frequency eigenmodes. Source data are provided as a Source Data file.

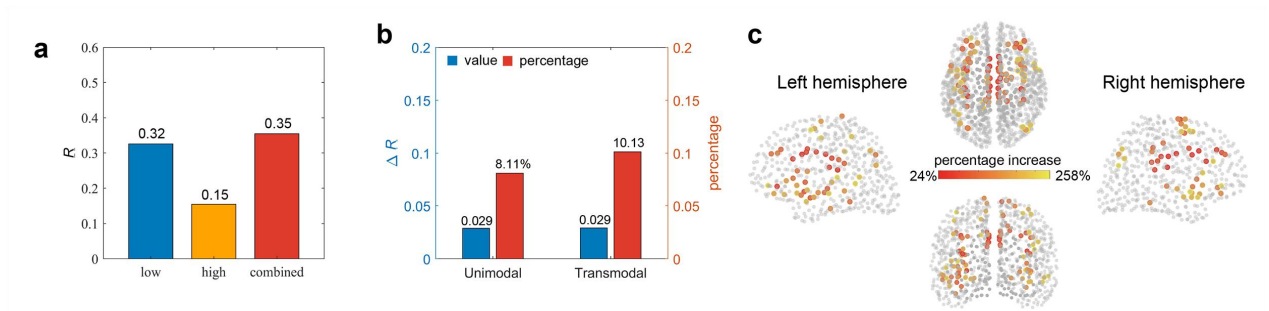

250

251

**Fig. S11.**

252

253

254

255

256

257

258

259

260

LASSO regression for all three prediction models. We performed Lasso regression separately for low-frequency model, high-frequency model, and low-high combined model, which may result in the elimination of low-frequency features. **(a)** The prediction performances of low-frequency eigenmodes (blue), high-frequency eigenmodes (orange) and low-high combined model (red). **(b)** The increments (blue) and increase percentages (red) in prediction accuracy with the addition of high-frequency eigenmodes for unimodal and transmodal regions. **(c)** The spatial distribution of the top 10% of nodes with the highest percentage increases in prediction accuracy. Source data are provided as a Source Data file.

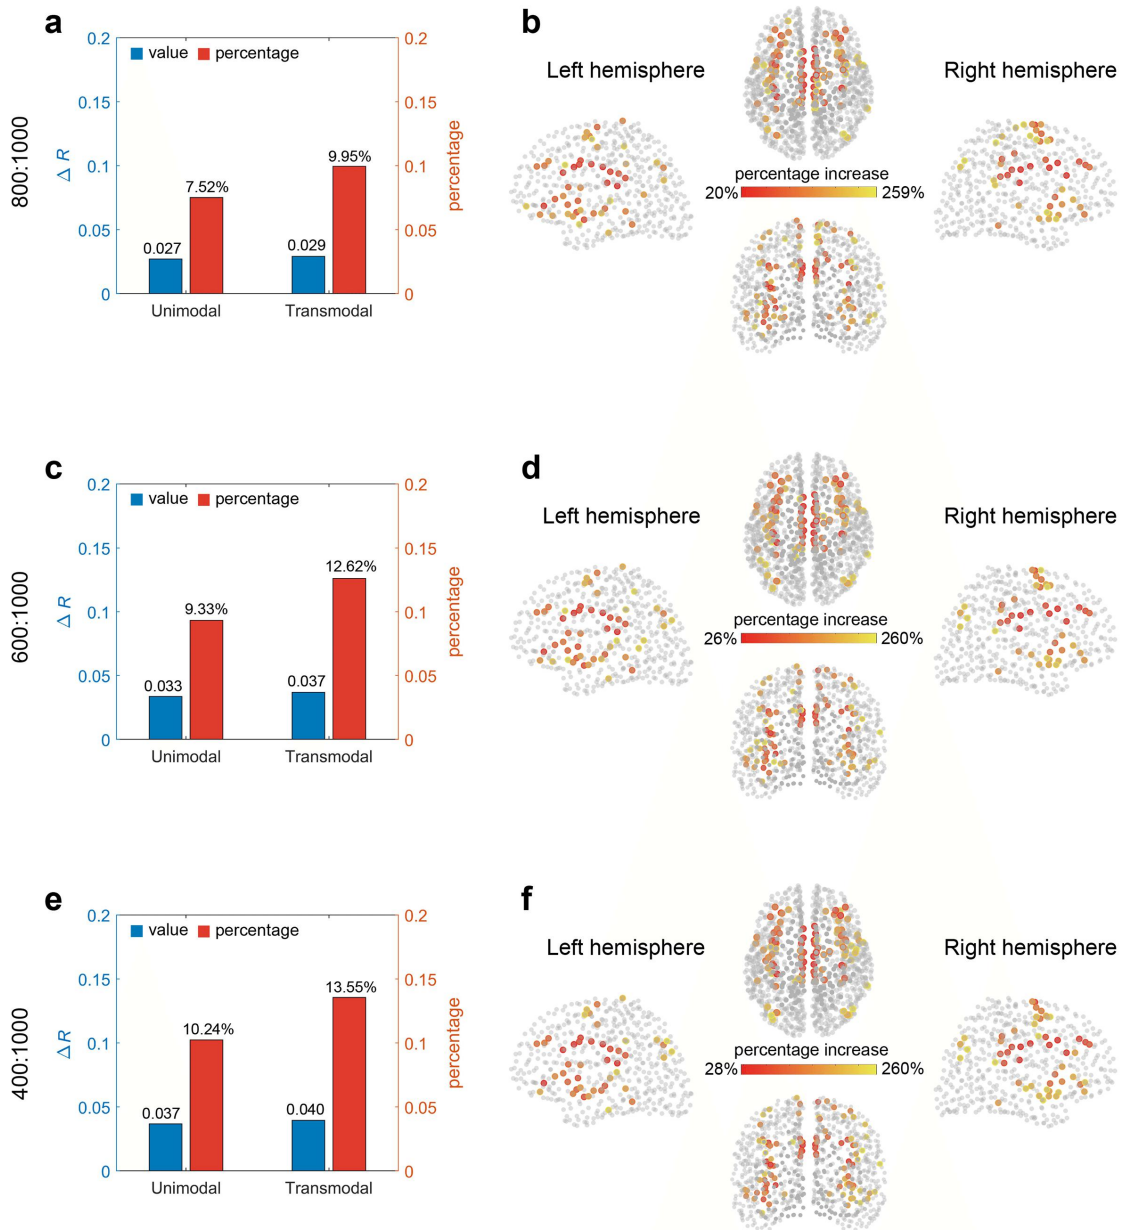

261

262

**Fig. S12.**

263

Replication of main results under different high-frequency thresholds. Left panel: the increment (blue) and increase percentage (red) in prediction accuracy with the addition of high-frequency eigenmodes for unimodal and transmodal region. Right panel: The spatial distribution of the top 10% of nodes with the highest percentage increases in prediction accuracy. (a-b) Results of high-frequency eigenmodes defined as 800:1000 modes. (c-d) Results of high-frequency eigenmodes defined as 600:1000 modes. (e-f) Results of high-frequency eigenmodes defined as 400:1000 modes. Source data are provided as a Source Data file.

264

265

266

267

268

269

270



271  
272  
273  
274  
275  
276  
277  
278  
279  
280  
281  
282  
283  
284  
285

### Supplementary References

1. Tewarie, P., Bright, M. G., Hillebrand, A., Robson, S. E., Gascoyne, L. E., Morris, P. G., ... & Brookes, M. J. (2016). Predicting haemodynamic networks using electrophysiology: The role of non-linear and cross-frequency interactions. *Neuroimage*, 130, 273-292.
2. Hunt, B. A., Tewarie, P. K., Mougin, O. E., Geades, N., Jones, D. K., Singh, K. D., ... & Brookes, M. J. (2016). Relationships between cortical myeloarchitecture and electrophysiological networks. *Proceedings of the National Academy of Sciences*, 113(47), 13510-13515.
3. Tewarie, P., Abeysuriya, R., Byrne, Á., O'Neill, G. C., Sotiropoulos, S. N., Brookes, M. J., & Coombes, S. (2019). How do spatially distinct frequency specific MEG networks emerge from one underlying structural connectome? The role of the structural eigenmodes. *NeuroImage*, 186, 211-220.
